# Supplementary material for: Formulation and Optimization of Quercetin-Loaded PEGylated Multi-Walled Carbon Nanotubes for Improved Breast Cancer Treatment
Source: Research Square preprint supplement (doi:10.21203/rs.3.rs-7583197/v1), 2025-11-13
Supplement: Supplementary file 1 [file 7c67f72fd8805c0e2e70c9f1.docx]

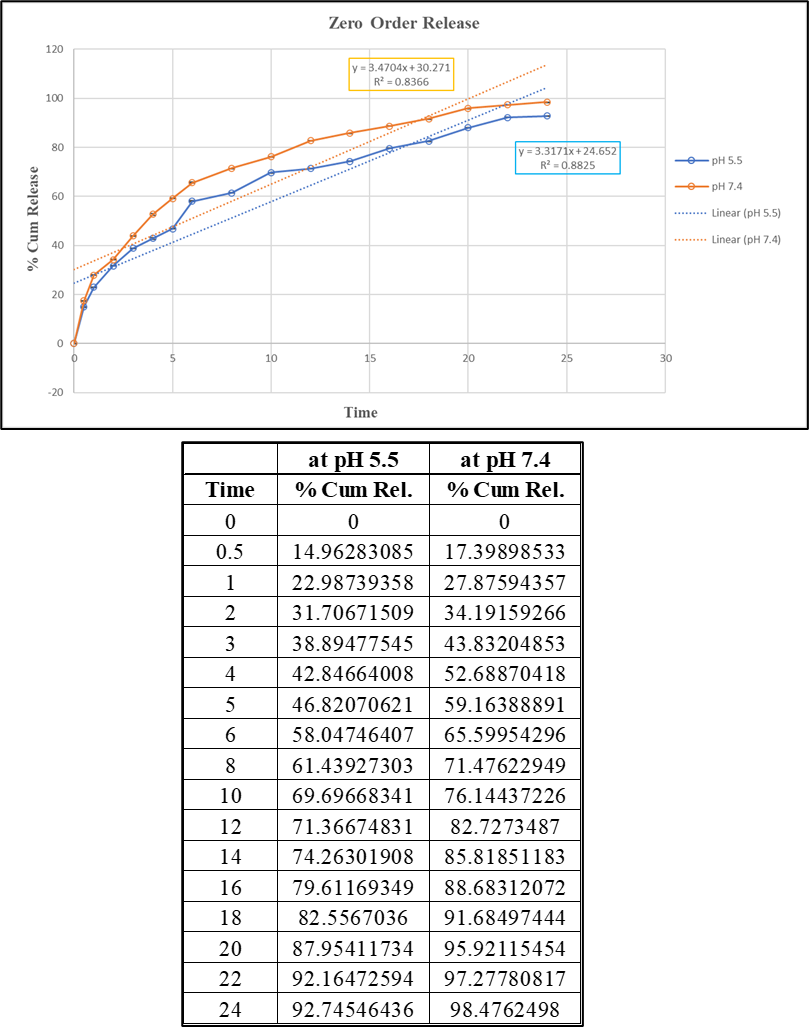

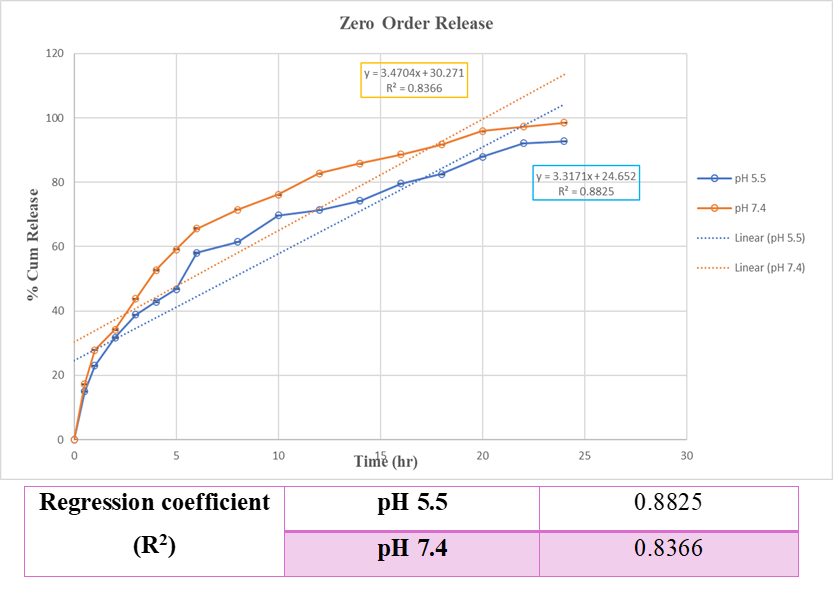

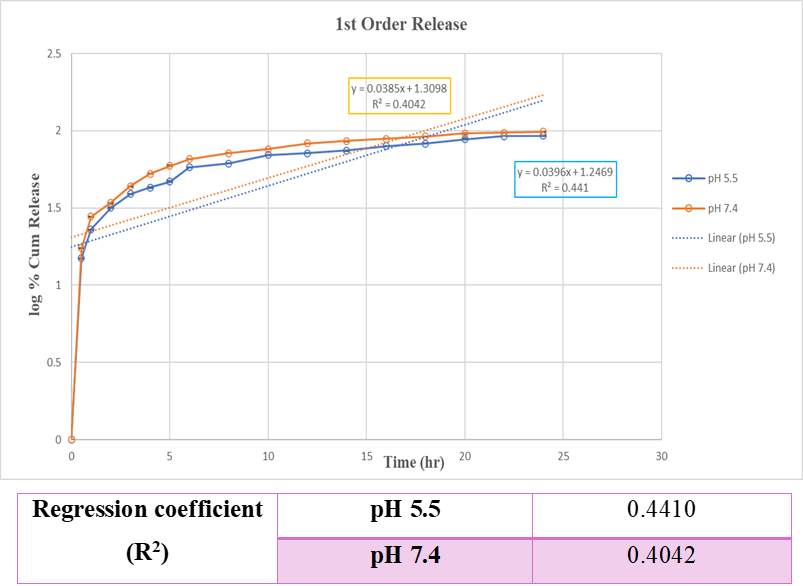

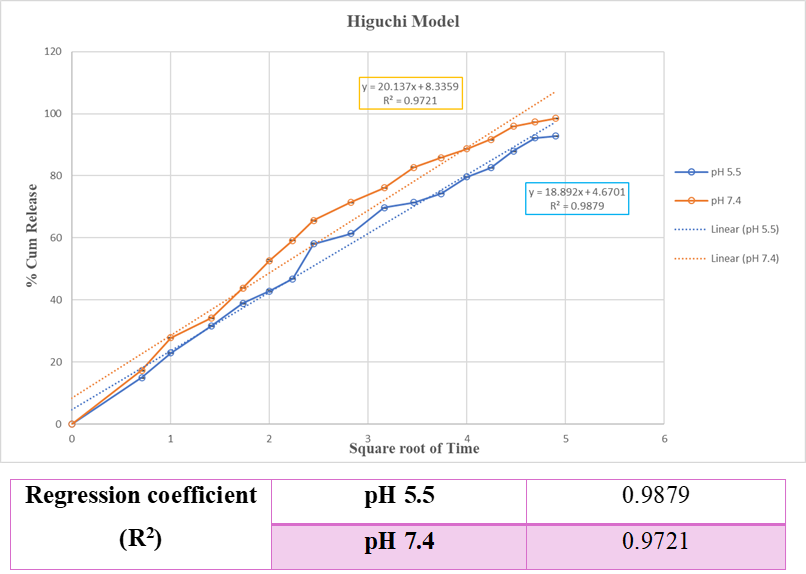


***In Vitro* Drug Release Using Dialysis Bag**

**Zero Order Release**

**First Order Release**

**Higuchi Release Model**


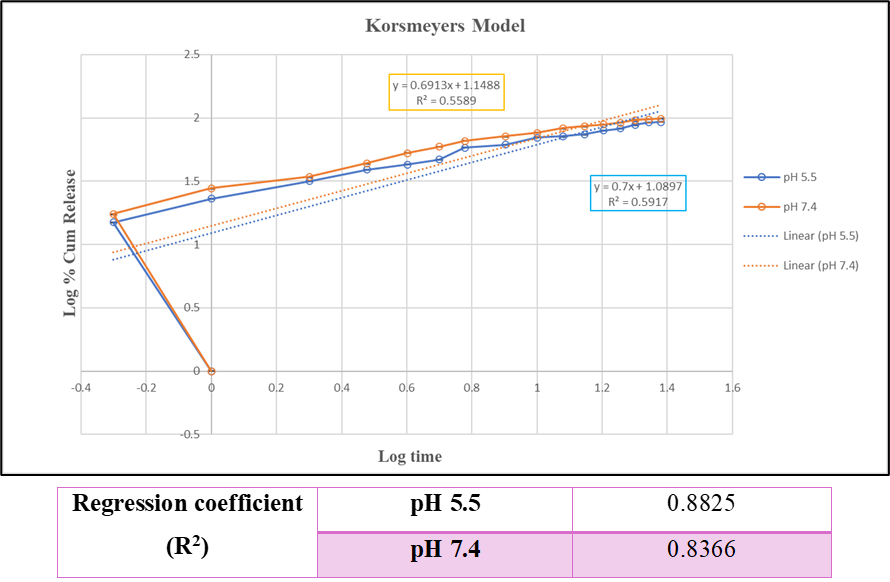


**Korsmeyer Peppas Model**

**Fig S1.** % Cumulative release vs Time graph at pH 5.5 and pH 7.4

(A)

(B)

**Fig S2.** (A) Calibration plot of % cell viability v/s drug concentration (B) % Cell viability values of MCF7 cells after 24hrs.


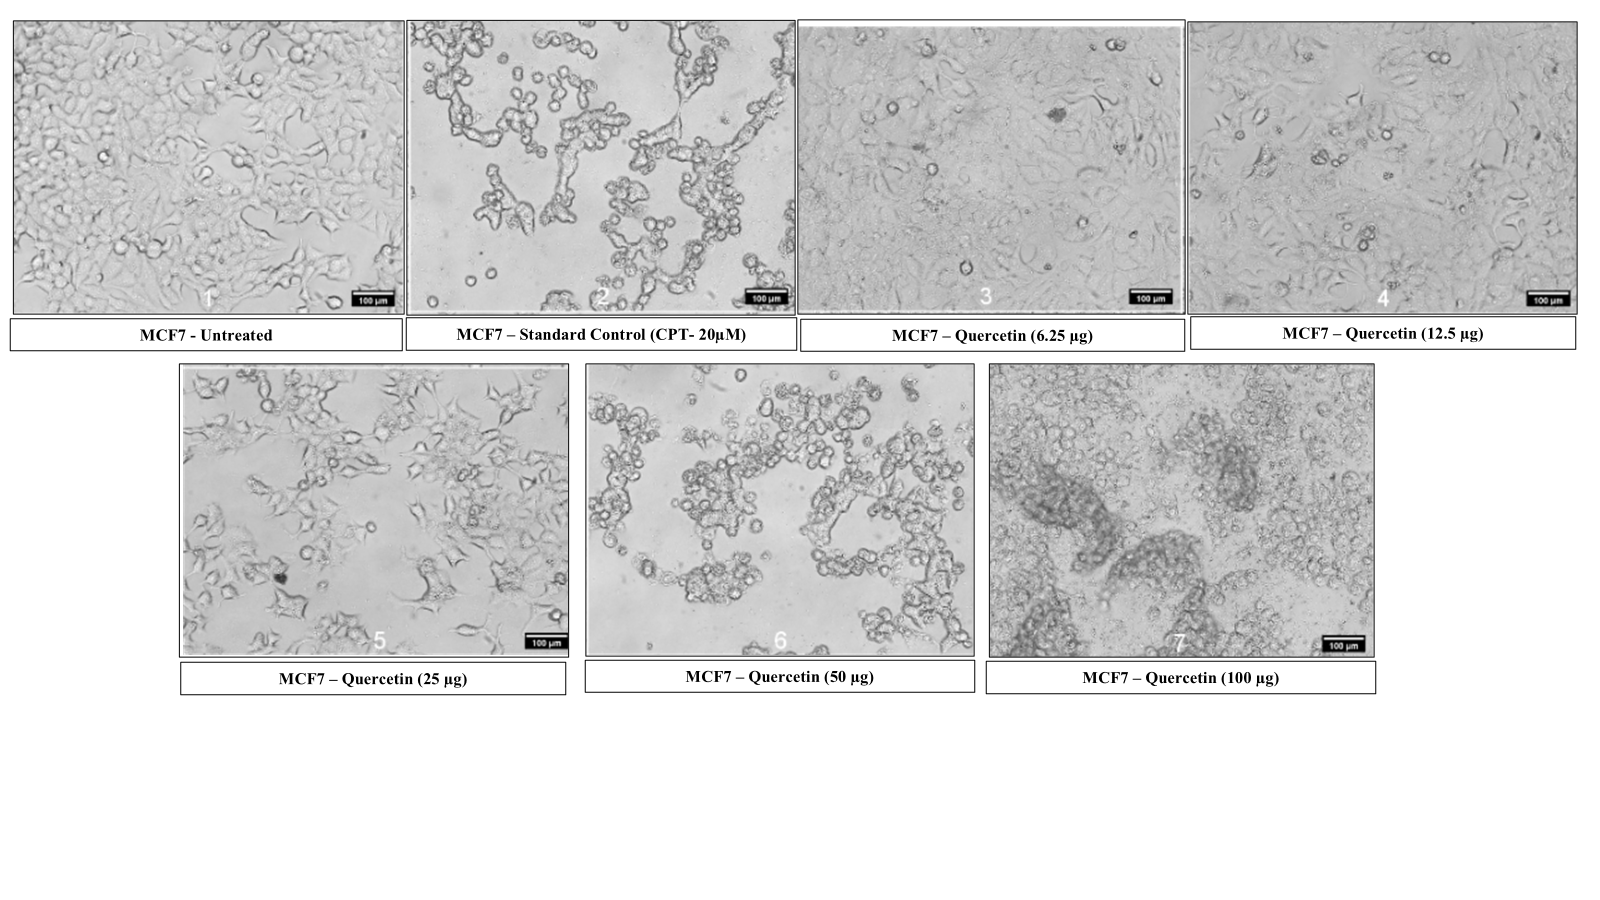


**Fig S3.** Morphology of MCF7 cells after 24h Quercetin treatment (20x magnification).

**
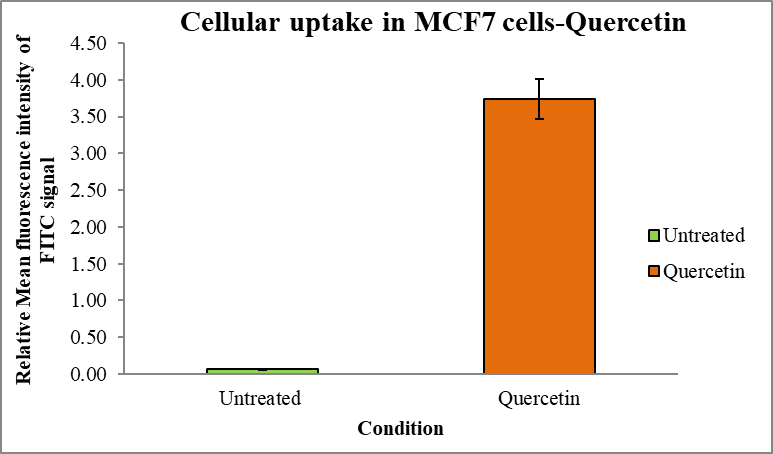
**

**Fig S4.** Cellular uptake in MCF-7 cells - Quercetin


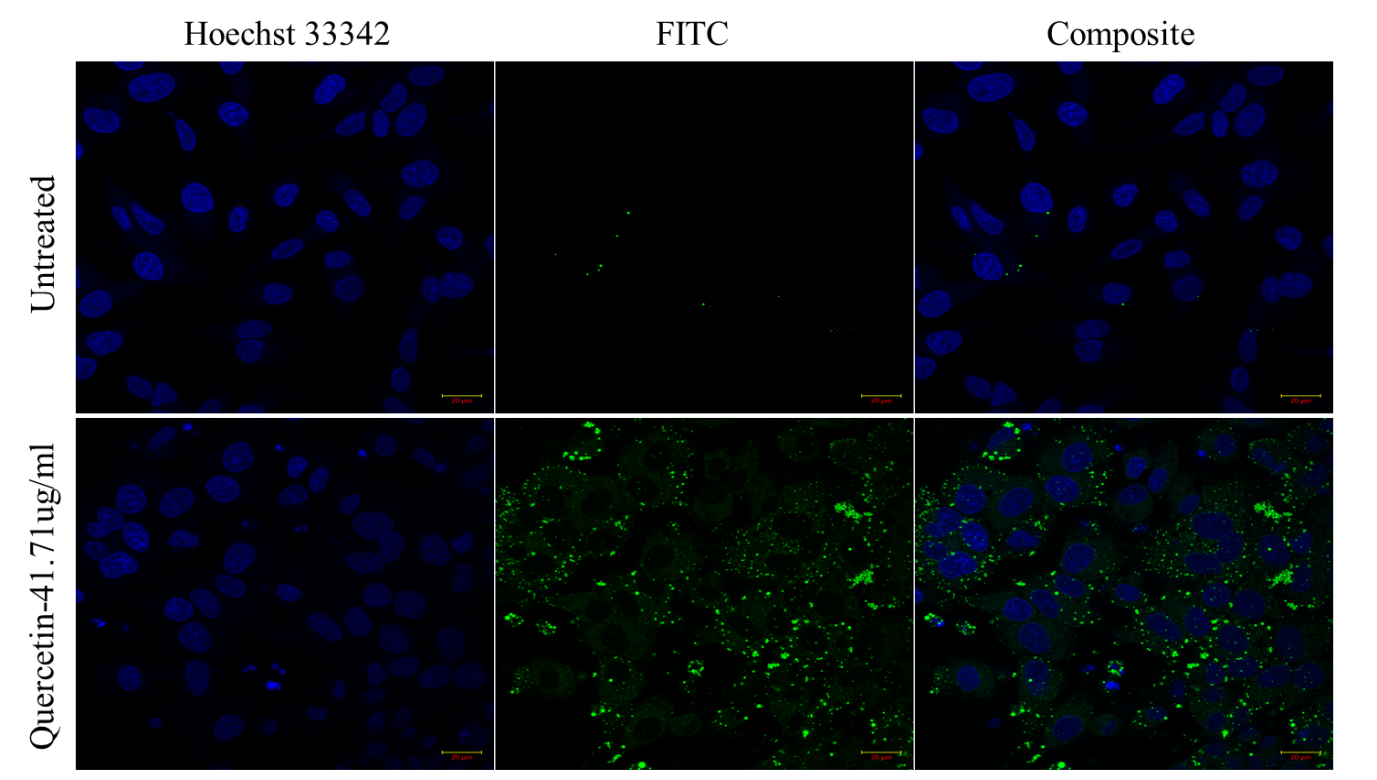


**Fig S5.** Overlaid Montage image represented the cellular uptake effect of Quercetin with 42µg/ml after the incubation period of 4 hour by Confocal Microscopy
